Novel methods PGC isolation culture

8

9 **ABSTRACT**

10 **Background:** The progenitor cells in adult tissues are scarce and have a great regenerative  
11 potential. In this study novel methods were used to improve the isolation and culture of the  
12 chicken primordial germ cells (PGCs) from stage X and HH 8-9 embryos. The cellular size  
13 and external glycoprotein envelope were the two criteria studied and used.

14 **Results:** PGCs were segregated with high efficiency and purity, from stage X and HH 8-9  
15 gross cell suspensions through cell strainers with 10  $\mu\text{m}$  of pore size. In embryos *in toto*, WGA  
16 Alexa 594 (affinity for N-acetylglucosamine) and Con A Alexa 488 (binding D-mannosyl)  
17 were used to characterize external polysaccharides of the PGCs. The PGCs in stage X  
18 embryos (zone pellucida), have predominately Nacetylglucosamine and later on, in HH 8-9  
19 embryos (cephalic zone),  $\alpha$ -D mannosyl residues, in a specific manner. In coated plates with  
20 the appropriate lectin and in alkaline conditions, isolated cells from stage X and HH 8-9  
21 embryos formed numerous clumped PGC-LCs with spherical shape “germspheres”. In all  
22 isolates from single embryo, immunohistochemistry confirmed that they were PGCs and  
23 revealed that the “germspheres” were formed by hundreds of positive cells to VASA and  
24 SSEA-1. N-acethyl D+glucosamine supplementation to the culture media greatly enhances the  
25 amplification of isolated PGC-LCs.

26 **Conclusions:** These gentle and quick strategies with high yields of PGCs can be potentially  
27 useful for many progenitor cells in Regenerative Medicine.

28 **Keywords:** Progenitor cell; chick PGC; cell strainer; coated-lectin plate and  
29 Nacetylglucosamine supplementation.

30

31

32

33

34

35

36

37

38

Novel methods PGC isolation culture

## 39 **Novel methods of isolation and amplification of progenitor cells** 40 **applied to avian primordial germ cells**

41 Mariacruz Lopez-Diaz<sup>1b</sup>

42 <sup>1</sup>Gene Expression Laboratory, Salk Institute for Biological Studies, 10010 North Torrey Pines  
43 Road, La Jolla, California 92037, USA.

44

### 45 **BACKGROUND**

46 Just like any other progenitor cells in adult tissues, primordial germ cells (PGCs) are scarce  
47 during embryonic development. This is the main reason why in mammals the culture of  
48 PGCs, precursors of oocyte and spermatozoa, can only be achieved for short periods.  
49 Although sophisticated strategies are being developed to circumvent this inconvenient, like  
50 3D engineering biotechnologies to imitate the germ cell niche (1) or the complicated  
51 differentiation procedures of embryonic stem cells (ESCs) or induced pluripotent stem cells  
52 (iPSC) into PGCs, still PGCs are not optimally sustained (2).

53 Things are quite different for avian PGCs whose origin, morphology and migration have been  
54 well characterized (3, 4, 5) since first described by Swift (6). Several advantages have been  
55 pointed out in the avian embryo: the development can be openly observed and the PGCs  
56 migrate to the gonads through the blood stream from where they can be isolated. When  
57 thousands of PGCs are in blood or have colonized the gonads (gonocytes) many procedures  
58 have been described for the enrichment of the cell suspensions, from unspecific ficoll  
59 separation (7, 8) to efficient IMACS or FACS sorting (9), yet yields of germ cells are  
60 commonly low and their manipulation is tricky. Besides, the methodologies suffer a consistent  
61 gender bias: most culture systems have succeeded with male PGCs extracted from blood (10,  
62 11,12), but only in few instances could female PGC lines be derived (13, 14, 15). This is  
63 among the main limitation when current avian germline technologies are implemented for  
64 genetic resource preservation as well as other applications.

65 One reason for this bias could be related to the earlier activation of the pathways leading to  
66 the onset of meiosis in this gender compared to males; if this is correct, it would be critical  
67 that cells be isolated from embryos at the earliest possible stages (f.i. at oviposition, stage X).  
68 By doing that we run into a new difficulty: PGCs numbers in blastodermal stages are  
69 estimated in thousands (100-120). Therefore, implementing highly efficient, yet gentle  
70 procedures for PGCs isolation from blastodermal embryonic disc would be of paramount  
71 importance.

72 Overall studies made in Biology have focused their efforts on the protein composition,  
73 structure, expression etc. and very few have explored the role of glycoconjugates, especially  
74 glycoproteins beyond their peptide component. In general, isolation-enrichment protocols are  
75 based on monoclonal antibodies against primordial germ cell surface antigens (SSEA, EMA),  
76 which have been proven to be tedious, expensive and harmful methods (16, 9). To solve these  
77 inconvenients we propose the use of lectins, proteins that bind/recognize carbohydrates of

---

<sup>b</sup> Present address: Instituto Nacional de Investigación y Tecnología Agraria y Alimentaria (INIA). Departamento de Reproducción Animal. 28040 Madrid – Spain. Phone 034913473757. e-mail: lopez.maria@inia.es.

#### Novel methods PGC isolation culture

78 glycopeptides. Since late XIX century, lectins were used to identify blood groups, later on it  
79 was proven that glycans were antigenic and the lectins were used to capture white cells for  
80 bone marrow transplantation in leukemia patients (17). Nowadays, again lectin microarray  
81 analysis has been used to identify and select human pluripotent cells from non-pluripotent  
82 (18). Therefore, we characterize their polysaccharide's composition and take advantage of the  
83 distinct mucopolysaccharide profile of PGCs for their isolation, selectively binding,  
84 segregating and culturing them by means of specific lectins and their carbohydrates.

85 On the other hand, embryonic cells during embryo development are in a frantic movement, in  
86 fact the migration route of PGCs until they reach the gonads is well known (4). The  
87 metastazing ability of cancer cells is also related to their external mucoid envelope rich in  
88 glycoconjugates, called "glycocalix". These mucoid envelopes are like flexible shields that  
89 confer protection to progenitor cells in their journey during development. Chemoattractant  
90 factors expressed in extracellular matrix are involved in the migration of PGCs but their  
91 capacity of migration is also related to changes in their glycoconjugate composition.  
92 Nacetylglucosamine (GlcNAc), glucosyl and mannosyl rich glycoconjugates are present in  
93 migrating PGCs but are not detected when the PGCs are established in the gonads (19). When  
94 PGCs are amplified in culture with the purpose of grafting them later onto recipient embryos  
95 to generate germ line chimerae, attention should be paid to the maintenance of a "healthy"  
96 glycocalix. Supplementation of culture media with Nacethyl D+glucosamine, one of the most  
97 abundant residues in PGCs surface oligosaccharides would facilitate the generation of the  
98 mucoid wrapping on the growing cells. To our knowledge, no such study has been done  
99 neither with PGCs nor with any other progenitor cell type.

100 An other distinct feature of PGCs and gonocytes, is their large size, relative to any other  
101 embryonic cell population. Yet, enrichment procedures based in cell segregation by size have  
102 not been attempted (5) so far. We developed a gentle, simple procedure for PGC isolation  
103 from stage X by size exclusion. In all our studies we consider that the albumen pH is above 8  
104 for the first 3 days of avian embryo development, trying to emulate the alkaline environment  
105 in which avian embryos develop initially (20, 21).

106 Therefore, in order to improve isolation and culture conditions of PGCs, we explore in this  
107 study novel strategies for isolation of PGCs studying the external glycoprotein envelope and  
108 cellular size. We also created the conditions of a novel method for culture PGCs in which the  
109 supplementation of carbohydrate and initial alkaline culture conditions were studied. These  
110 strategies are gentle, quick and most important high quality yields of PGCs can be obtained.  
111 Potentially could be useful for many progenitor cells in Regenerative Medicine.

112

113

114

Novel methods PGC isolation culture

115

## 116 **RESULTS**

### 117 **Characterization of PGC-LCs in stage X and HH 8-9 embryos using lectins.**

118 The pattern of sugars was very different between the two embryonic stages studied; when  
119 labelled lectin *WGA* Alexa 594 (with high affinity for N-acetylglucosamine) was used, it  
120 revealed that in stage X embryos there are cells or groups of cells clearly marked in the zone  
121 pellucida of embryo, where PGCs are localized at that stage of development. However, when  
122 *Con A* Alexa 488 (binding both D-mannosyl and D-glucosyl residues) is used, all cells are  
123 equally marked; in the centre there is no any especially marked zone (Fig. 1). On the contrary,  
124 in HH 8-9 embryos *Con A* Alexa 488, marked large cells around the cephalic area, where the  
125 PGCs are migrating at this stage of the development (Fig. 2). When *WGA* Alexa 594 is used,  
126 small and large cells are labelled over the entire embryonic body (Figs. 2, 3).

127 Since lectins can bind to various sugars we doubted that they could reveal significant  
128 differences between the two embryonic stages. However, the pattern was not only surprisingly  
129 different but also in embryos HH 8-9 *Con A* marked large cells in the cephalic area where  
130 PGCs are expected to concentrate at this stage. To confirm that these were PGCs we  
131 conducted a double staining using lectin-glycohistology and *VASA* immunohistochemistry. It  
132 was confirmed that these large cells were PGCs (Figs. 3, 4). Therefore, lectin-glycohistology  
133 with *Con A* Alexa 488 revealed that PGCs are rich in  $\alpha$ -D mannosyl and  $\alpha$ -D glucosyl  
134 residues when they are migrating to the gonads (Figs. 2, 3, 4) in a specific manner.

135 From this study it is clear that during the embryo development the PGCs change their  
136 composition in polysaccharides. The PGCs present in stage X embryos have in their outlayer  
137 predominately Nacetylglucosamine and later on, they are rich in  $\alpha$ -D mannosyl and  $\alpha$ -D  
138 glucosyl residues in a specific manner.

139 It is important to emphasize that using labelled lectins allowed us to characterize the  
140 composition of polysaccharides in just 10 minutes, and also gave us valuable information for  
141 the next study.

### 142 **Immobilized lectins**

143 ELISAs are based on microplates coated with antigens or antibodies (proteins) and their  
144 specific binding (antibody-antigen). Since the lectins are proteins, we considered the  
145 possibility that culture plates coated with lectins could retain cells rich in mucins as it is the  
146 case of PGCs. Based on the results obtained in the study made with labelled lectins, we coated  
147 culture plates with *WGA* and *Con A* and the binding was evaluated immediately under  
148 inverted microscope.

149 The uncertainty about if the affinity between lectin-glycoprotein binding was high enough  
150 was successfully unveiled immediately at the first attempt of isolation. Therefore, in the  
151 following isolations we attempted to go further and the retained cells were subjected to  
152 different culture conditions. We observed in lectin coated-plates that after one hour of  
153 incubation at room temperature, cells were loosely rooted to the plate, as if they were tethered  
154 by a transparent mucous material, and also observed that there were many cells with  
155 morphology compatible with PGCs (Fig. 5). On the other hand, it is known that the albumen  
156 that is bathing the chick embryo has a pH above 8 for the first 3 days, trying to emulate the  
157 environment in which avian embryos are developed initially (20, 21), the cells retained by

#### Novel methods PGC isolation culture

158 lectins were cultured under an alkaline environment. Under culture conditions of alkaline pH,  
159 at 37°C and during 48 hours both lectins were effective in retaining cells. In control plates non  
160 lectin-coated, the cells disappeared completely (Fig. 5)

161 The most striking results were those obtained from HH 8-9 embryos under culture conditions  
162 of alkaline pH, at 37°C and during 48 hours. The isolated cells formed numerous clumped  
163 PGC-LCs with spherical shape, which were above a layer of cells, which in turn, were  
164 strongly bound to the plate. Some cells that were detached and floating close to the cell  
165 clusters, resembled morphologically to the PGCs previously described.  
166 Immunohistochemistry confirmed that they were PGCs and revealed that the colonies are  
167 formed by hundreds of positive cells to *VASA* and *SSEA-1* (Fig. 6). Cells isolated from stage  
168 X embryos attached tightly when plates were coated with *WGA*, cell retention was observed  
169 within seconds and big cells with refringent granules were plated in the first two hours under  
170 culturing conditions with alkaline pH after 48 hours at 37°C.

171 Therefore, in the plates lined with lectins the retained cells showed different morphologies.  
172 Lectins retained the PCGs and favored its cultivation when isolates from HH 8-9 embryos  
173 were used. From every single embryo seeded into coated plates thousands of PGCs were  
174 cultured in just 48 hours. Although we did not sex embryos, the same results were seen in all  
175 15 isolates.

#### 176 **Cell strainers**

177 The bibliography is full with descriptions of PGCs and many of them agree in that they are  
178 large cells. However, during the developmental stage X although it is known they are in the  
179 zone pellucida, are very difficult to differentiate from other cells because they are scarce (100-  
180 120) and the other cells are also large (20,000-50,000). Cellular differentiation is even more  
181 complicated at the moment of isolation because there are always traces of yolk very refringent  
182 with spherical shapes. Therefore, taking advantage of the new cell strainers commercially  
183 available, that are able to discriminate particles with differences as little as of 1  $\mu\text{m}$  we  
184 explored their usefulness to separate PGCs.

185 In stage X embryos almost half of the fresh pellet was retained in the cell strainer of 10  $\mu\text{m}$   
186 while the other half passed through the smallest size tested (6  $\mu\text{m}$  estimates by pellet size).  
187 *VASA* immunohistochemistry revealed that almost all *VASA* positive cells are larger than 10  
188  $\mu\text{m}$  and the range of diameters in cells retained was 24-30  $\mu\text{m}$ . On the contrary, in HH 8-9  
189 embryos 20% of the fresh pellet was retained in the cell strainer of 10  $\mu\text{m}$  the range of  
190 diameters in *VASA* positive cells retained was 14-17  $\mu\text{m}$ , indicating that the PGCs are smaller  
191 at HH 8-9 versus stage X embryo (Table 1). These results indicate that the cell strainers with  
192 pore size less than 10 $\mu\text{m}$  can retain the majority of PGCs from stage X and HH 8-9 embryos,  
193 and most important the purity of PGCs isolated is almost complete (Fig. 7).

#### 194 **Cultured cells**

195 In order to obtain success in culturing, a minimum number of cells is imperative and the  
196 purity of cellular isolates is also critical. In the case of PGCs there is an additional problem:  
197 female PGCs initiate meiosis, which is incompatible with cellular division earlier than male  
198 PGCs. Most of the studies on chicken PGC isolation have been made with circulating PGCs  
199 and they have been successful with cultured male PGCs, but almost all have failed with  
200 female PGCs. Therefore, all our studies were primarily focused to obtain cultured PGCs from  
201 stage X embryos and also in stage HH 8-9 embryos because in the latter the number of cells

#### Novel methods PGC isolation culture

202 has increased exponentially, both stages are far enough from first signals of meiosis in both  
203 gender.

204 PGC-LCs were seen after 4-5 days of culture of cell isolates from both stage X and HH 8-9  
205 embryos, although the proportion was higher in stage X embryos. In stage X cultures many  
206 floating PGC-LCs were seen in all treatments used, their number being especially remarkable  
207 on the first day of culture when grown in N-acetyl-D-(+)-glucosamine supplemented germ  
208 basic medium. On day 14 of culture plenty of floating refringent cells, resembling gonocytes,  
209 were detected in this group on the bottom of the plate. Their diameter was typically larger  
210 than 30  $\mu\text{m}$ , and many could be seen surrounded by a spherical capsule (26-43  $\mu\text{m}$  in  
211 diameter). Some were leaving the capsule and some were mitotically active (Fig. 8).

212 Once the PGCs-LC started to appear, the use of hanging cell inserts allowed us an easy  
213 management of medium changes without losing cells and a closer observation of the cellular  
214 evolution.

215

Novel methods PGC isolation culture

216

217 **DISCUSSION**

218 In this study we demonstrate that the mucoid envelope of the PGCs in very early stages of  
219 embryo development (after oviposition, comparable to blastocyst stages in mammals) changes  
220 the glycans exposed in a specific manner as embryonic development progresses.

221 Our studies made for carbohydrate characterization of the PGC-LCs in stage X embryos using  
222 lectins revealed that *WGA* Alexa 594 (with high affinity for Nacetylglucosamine) labeled cells  
223 or cell clusters which could be seen all over the zona pellucida where the PGCs are located at  
224 this developmental stage. In HH 8-9 embryos we found that *Con A* alexa 488 (specific binding  
225 for  $\alpha$ D-mannose) also provided highly efficient, specifically labeling only PGCs of whole HH  
226 8-9 embryos, without background. In our experiments, we saw a perfect match between *Con*  
227 *A* alexa 488 and *VASA* labeling in HH 8-9 embryos. *VASA* is considered as the only specific  
228 antibody marker of the embryonic germline, from stage X to oocyte differentiation. Until now  
229 good antibodies against chicken *VASA* were limited but the one used in this study turned out  
230 to be very specific and commercially available. Therefore, in HH 8-9 embryos *Con A* alexa  
231 488 is specific and can be used alone as marker or as a capturer. However, we must  
232 emphasize that lectin histochemistry advantages are numerous over immunohistochemistry;  
233 particularly it is more stable, cheaper and faster (one single step assay, reaching a clear signal  
234 in a few minutes, with negligible background). Above all of these advantages, lectins are  
235 better characterized with respect to binding specificity than monoclonal antibodies.

236 Our studies indicate that a progressive change in the carbohydrate profile is happening after  
237 oviposition, taken into consideration the spatiotemporal dynamics of PGCs and the results  
238 using lectin and immune labeling procedures. We did not expect lectins to have such  
239 specificity for PGCs in such a narrow window of time. Cells in blastodisc stage X are less  
240 differentiated than in HH 8-9 embryos and we know that the less differentiated a cell is; the  
241 less distinct transcriptional factors are expressed. In fact, in stage X embryos it is very  
242 difficult to differentiate PGCs from other cells using standard histological procedures (PAS,  
243 haematoxylin eosin, etc). However, *WGA* and *Con A* marked PGCs with high specificity in  
244 stage X and with an exquisite specificity and affinity in HH 8-9 embryos, respectively.

245 Moreover, we also show that lectins selectively retain PGCs on culture dishes lined with these  
246 proteins. In our first attempt, lining for 1 hour at room temperature was enough to immobilize  
247 stage X embryo PGC-LCs in a matter of seconds after seeding. It has been reported that *Kds*  
248 for lectins-monosaccharides binding in ELLA (enzyme lectin labeled assays) ranges between  
249  $2 \times 10^{-6} \times 10^{-7}$  M (22); we demonstrated that these *kds* are strong enough to retain PGCs. Further  
250 studies on lectin-coated plates would allow the optimization of the plate coating conditions  
251 (temperatures, coating time, lectin concentration, reaction time, etc). The coated-lectins plates  
252 could be very well used in kinetic studies made with valuable cell lines (f. i. fetal human cell  
253 lines) to figure out the lectin with the highest *Kd* and even to characterize the  $\alpha$  or  $\beta$  sugar  
254 structure of the glycoconjugate(s) with binding competitive studies using different haptens.

255 Because of the success obtained in the number of PGC-LCs retained, in our next experiments  
256 we tried to culture the bound PGCs-LC with germ basic culture medium emulating the  
257 alkaline conditions of the blastodisc within the egg the first three days (22). Under these  
258 conditions, in just one step we were able to isolate and culture thousands of PGCs forming  
259 numerous germspheres in 48 hours from one single HH 8-9 embryo. Later on, PGCs were  
260 further amplified and subcultured under standard coculture conditions (13, 23, 24). As



## Novel methods PGC isolation culture

261 expected, given the PGC count at different stages and assuming similar lectins's *Kds* in all  
262 stages, the number of retained PGCs was higher in HH 8-9 than in stage X embryos. We must  
263 emphasize that not only the number of PGCs recovered per embryo was remarkable, but also  
264 we had same efficiency in all isolates. The large number of harvested PGCs would allow  
265 further manipulations like transgenesis or germline chimera construction. For instance, female  
266 germline chimeras could be produced with an expected 50% success, after PCR-sexing of  
267 these cultures, but not the receptor embryos.

268 Despite the differences observed between lectins in our PGC characterization studies, both,  
269 *Con A* and *WGA*, were effective in retaining PGCs on the plates. This might be due to the  
270 cross-reactivity of lectin with several sugars (*Con A* binds  $\alpha$ Dmannose but also  $\alpha$ Dglucose).  
271 Also, we did not exhaustively count the number of cells bound for each ligand; therefore,  
272 differences might exist that were not quantified.

273 We also succeeded in segregating, with a very high purity, PGCs from stage X and HH 8-9  
274 gross cell suspensions through cell strainers (size exclusion  $> 10\mu\text{m}$ ), characterizing them  
275 morphometrically ( $>15\ \mu\text{m}$  in diameter for HH 8-9 embryos and even larger for stage X  $>20$   
276  $\mu\text{m}$ , as expected) and immunohistochemically (*VASA*). Up to date, the cell strainers  
277 commercially available had as minimum a pore size of  $40\ \mu\text{m}$ , however, we used new  
278 commercially available cell strainers of 30, 20, 10 and  $6\ \mu\text{m}$  pore size, which allowed us a  
279 very fine cell sieving.

280 The isolation efficiency of stem cells is an important challenge in Regenerative Medicine. In  
281 general, target progenitor cells are scarce and disperse, making their isolation difficult from  
282 almost any tissue. For their successful culture, a minimum number of cells is imperative and  
283 the purity of cellular isolates is also critical. As in the present study, labeled lectins could be  
284 used for embryonic stem cell differentiation studies or for isolation purposes from stem cell  
285 niches in differentiated tissues. Surface carbohydrates of the target cell population should be  
286 firstly characterized "in situ" with labeled lectins. The appropriate raw lectin and the hapten  
287 can then be used to trap and enrich these cells on culture dishes, respectively. Likewise, cell  
288 strainers could be used as an easy and gentle procedure for the segregation of specific cell  
289 lineages from tissue homogenates of different origins.

290 In terms of PGC-LCs long-term culture, we were able to maintain and grow PGCs and  
291 gonocyte like cells (mitotically active) from stage X embryos for 20 days in culture. We have  
292 not found any study or data with these strategies showing such efficiency from stage X  
293 embryos. This advantage is especially important if we want to culture female PGCs, because  
294 the farther in time the signals of the meiotic phase are, the better. It has been proven that  
295 cultured PGCs and gonocytes are able to colonize the gonads and that the efficiency of  
296 germline transmission is higher when PGCs are sourced from less developed embryos (24).  
297 The earliest source used by the majority of studies in chicken is circulating PGCs because,  
298 although they are not completely naïve, they are present in blood at relatively high  
299 concentrations and handling them in a liquid matrix is easier. These cells have been  
300 successfully amplified in vitro, but, after long periods in culture, two significant problems  
301 arise: a clear bias for male PGCs, and a substantial loss of migration capacity (11). Although  
302 we did not test the gonad colonization and germ line transmission ability of our cells, this  
303 capability has been reported to be lost after longer periods in culture (11, 12) than in our  
304 experiments (77-111 days, vs. 17-20 days in ours).

305 We evinced that N-acethyl D+glucosamine supplementation to the culture media could  
306 greatly enhance the amplification of isolated PGC and that gonocyte like cells were very well

## Novel methods PGC isolation culture

307 maintained in culture until day 20. Supporting our results are the reported results obtained in  
308 the mammalian nervous system, also rich in glycans, in which the single addition of GlcNAc  
309 initiates the biosynthesis of complex-type N-glycans which cover neural progenitor cells  
310 NPCs (25). The glycocalix of adult NPCs allowed to Hamanoue et al. to develop a lectin  
311 panning method based in lectin-coated plates similar to ours (26, 27, 28). Very few studies  
312 have been made in which lectins were used to isolate from adult tissues either precursor  
313 lymphocyte T (17) or NPCs (26). However, the differentiating feature in our study is the  
314 enrichment procedure, once the cells were trapped by lectin we add the carbohydrate, while in  
315 these other studies the authors tried to favour the cell culture conditions adding more lectin.  
316 Moreover, supporting our results in a very recent study Hamanoue has suggested that the  
317 glycans (biantennary and  $\beta$ 1, 6-branched N-glycans) and their enzymes (N-  
318 acetylglucosaminyltransferase GnTV) are implicated in NPCs migration and proliferation,  
319 rather than cell-cell attachment (29). We suggest that carbohydrates of glycans covering  
320 progenitor cells are also implicated into cell multiplication and most probably in cell  
321 migration and protection.

322 Interestingly, N-acetyl D+glucosamine is a structural component of microbial walls  
323 commonly used in microbiological media, it is also present in chicken PGCs and mouse  
324 NPCs. Maybe, this very well conserved carbohydrate residue from bacteria to eukaryotes cells  
325 can also share same immunological protective functions. We propose that cells cultured in  
326 vitro supplemented with the adequate carbohydrate could have an important role in cellular  
327 immunity protection, preventing the rejection of stem cells transplantation. Including as a  
328 supplement not only in chicken PGC growth media but also in other progenitor cell media like  
329 NPCs medium, could be the source for important glycoproteins and glycolipids. The very idea  
330 that a proper chemically identification of the carbohydrate and its addition for “in vitro”  
331 production of unrejectable mammalian stem and primordial germ cells it is a fascinating  
332 challenge.

333 Paraphrasing Cummings, “The lectins specificity has catapult the field of glycobiology into  
334 the modern era”. In our opinion, in view of our results together with the fact that lectins can  
335 differentiate between  $\alpha$  or  $\beta$  anomers of carbohydrates in glycans (3D sugar chemical  
336 structure) could catapult the field of glycobiology beyond the regenerative medicine” (22).

337 In summary, we have first shown that N-acetyl D+glucosamine is an abundant constituent of  
338 the outer cell membrane in the earliest developmental embryonic stages; second that binding  
339 by specific lectins is strong enough to isolate and retain PGCs and, third it is an appropriate  
340 supplement for long-term PGCs culture. These three propositions configure an argumental  
341 strength supporting the crucial role of carbohydrates of glycoconjugates in PGCs culture.

342 Nowadays, the real possibility to insert and control the gene expression in germ cells is  
343 crucial, because it guarantees stable transmission of the transgene to the germline. The  
344 knowledge of the chicken genome together with the development in genetic engineering to  
345 insert genes into certain cells or whole animals (30) predict extraordinary advances in next  
346 years ahead. Enthusiastically, we expect that the procedures exposed in this study will help to  
347 make important advances in regenerative medicine.

348

## 349 CONCLUSIONS

350 Herein we reported highly efficient, yet gentle procedures for PGCs isolation from  
351 blastodermal embryonic. The novel strategies improved the efficiency of PGCs isolation

## Novel methods PGC isolation culture

352 taking advantage of two distinct features of the early PGCs: their large size and their unique  
353 mucopeptide envelope. A rapid enrichment is obtained by one step screening using the  
354 appropriate cell strainers. On the other hand, a panning procedure with lectin coated culture  
355 dishes allows a selective retention. Followed by N-acethyl D+glucosamine supplementation to  
356 the culture media which enhanced the multiplication of PGCs.

357 The isolation and culture strategies developed for embryonic PGCs, could also be applied to a  
358 range of other progenitor cells present in very low numbers but with great interest for stem  
359 cell manipulations and for regenerative medicine applications.

## 360 **METHODS**

### 361 **Egg source**

362 Fertilized eggs were purchased from local suppliers in San Diego (CA, USA) that regularly  
363 supply the Salk Institute for research purposes.

### 364 **Stage X and HH 8-9 embryos isolation**

365 Embryos in stage X were dissected after dipping the yolks into cold saline solution. Fertilized  
366 eggs were incubated until chicken embryos reached stages HH 8-9; the cranial part of the  
367 embryos was dissected by using discs of filter paper because at these stages most of the PGCs  
368 are in the cephalic area. After dissection, the embryos were cleaned free from yolk residues  
369 and vitelline membranes under stereoscope. All isolations and some initial culturing  
370 conditions of PGCs were made under alkaline environment (21) and later under standard  
371 culture conditions (13, 24).

### 372 **Cell isolations**

373 The cells were dispersed by repeated pipetting, no enzymes were used. Two isolation  
374 procedures were tested in disaggregated cells from stage X and HH 8-9 embryos, some were  
375 seeded onto lectins-coated plates with *wheat germ agglutinin* (WGA) or *Concanavalin A* (*Con*  
376 *A*) and others filtered through six cell-strainers of decreasing pore size. Histochemical studies  
377 were made on PFA-fixed embryos “in toto”, and on isolated cells either in fresh or after  
378 fixation with 5% PFA.

### 379 **Characterization of Stage X and HH 8-9 embryos and cell isolates using lectins.**

380 *Lectin-histochemistry.* Two labeled lectins, *WGA-Alexa 594* and *Con A-Alexa 488*  
381 (Lifetechnologies), were used at manufacturer’s recommended working conditions. Fixed  
382 stage X and HH 8-9 embryos were blocked with 3% BSA and 0.1% triton X-100 in PBS  
383 overnight at 4°C. Later on, embryos “in toto” were incubated with labeled lectins at 37°C for  
384 10 minutes. Also labeled lectins were used for the characterization of isolated cells with  
385 immobilized lectins.

386 2.4.2. *Immobilized lectins* were used to capture PGCs from stage X and HH 8-9 embryos (10  
387 and 6, respectively) on 35 mm culture dishes (Falcon) coated with WGA (high affinity for N-  
388 acetylglucosamine) or *Con A* (binding both D-mannosyl and D-glucosyl residues) at a  
389 concentration of 250 mg/ml for 1.5 hours at room temperature. Excess of lectins was

#### Novel methods PGC isolation culture

390 discarded and the plates washed with DPBS. Dispersed cells from stage X and HH 8-9  
391 embryos were incubated for two days without CO<sub>2</sub> at 37° C; under these conditions the  
392 medium reaches alkaline pH values emulating albumen pH first three days of embryonic disc  
393 development (20, 21). After that, cells were detached from the plates using specific dilutors  
394 for both lectins with 500 mM *N*-acetylglucosamine (Vector Labs ES-5100) and 200 mM  $\alpha$ -  
395 methylmannoside/200 mM  $\alpha$ -methylglucoside (Vector Labs ES-1100) for *WGA* and *Con A*  
396 coated plates, respectively. On the third day the eluted cells were seeded into 48-well plates  
397 and co-cultured with inactivated BRL under standard conditions with 5% CO<sub>2</sub>, at 37°C (24).

#### 398 **Cell strainers**

399 A total of 30 stage X embryos (three batches, 10 embryos/batch) and 15 embryos at stages  
400 HH 8-9 (three batches, 5 embryos/batch) were filtered through cell strainers. The cell mass  
401 recovered from each strainer was evaluated under stereoscope and inverted microscope. In  
402 order to assert that sieving was working, measurements of filtered cell diameters were taken.  
403 Cell strainers were stacked from up the larger pore size (70  $\mu$ m) on top, down to the smallest  
404 (6  $\mu$ m). Pore sizes used were 70  $\mu$ m, 40  $\mu$ m (Falcon), 30  $\mu$ m, 20  $\mu$ m, 10  $\mu$ m and 6  $\mu$ m  
405 (Pluriselect). The mass of filtered cells was recovered from each cell strainer and centrifuged  
406 at 200xg for 15 minutes. Each pellet recovered was assigned a percentage such as the sum of  
407 all estimated pellet were 100%.

408 Immunohistochemistry with *VASA* antibody was made in order to identify where the PGCs  
409 were retained. Since it was proven that the majority of the *VASA*-positive cells was found to  
410 be retained in cell strainers of 10  $\mu$ m, we decide to use 24-well plates co-cultured with feeder  
411 BRL cells using hanging cells inserts of 5  $\mu$ m (as minimum twice smaller than cells diameter;  
412 Millicell Hanging Inserts Millipore). This allows us a closer follow up of PGCs evolution.

#### 413 **Co-Culture conditions**

414 *Culture media.* Germ cell culture medium used was the same as described in others works  
415 (van de Lavoie et al. 2006a; Song et al. 2014 and Miyahara et al. 2014). The medium  
416 consisted of knockout DMEM (Invitrogen), 40% buffalo rat liver (BRL)-conditioned KO  
417 DMEM, 7.5% FBS (Standard Hyclone), 2.5% Chicken Serum (Sigma), 2 mM GlutaMax  
418 (Invitrogen), 1 mM sodium pyruvate (Invitrogen), 1xNEAA (Invitrogen), 0.1 mM  $\beta$ -  
419 mercaptoethanol (Invitrogen), 4 ng/ml recombinant human FGF basic (rhFGFb) (R&D  
420 Systems), 6 ng/ml recombinant murine SCF (rmSCF) (R&D Systems), 1% Pen-Strep  
421 (Invitrogen). Sera used were previously frozen at -20°C, but not inactivated by heat.  
422 Complement inactivation is achieved if sera are frozen at higher temperatures of -70°C  
423 (Mariacruz López Díaz, patent P2001431678). Feeder BRL cells (ATTC 1442) were  
424 expanded and seeded at a concentration of 10<sup>5</sup>cells/ml in 48, 24 and 12-wells plates. When  
425 BRL cells reached 70% of confluence were inactivated with mytomicin 10mg/ml, one day  
426 before adding embryo cells.

427 Cells from each embryo were separately seeded in 48-wells plates coated with matrigel and  
428 with a feeder layer of mytomicin treated BRL cells. In all plates controls wells were seeded

#### Novel methods PGC isolation culture

429 with cells from HH 8-9 embryos following Song et al. procedure (2014). Cells from stage X  
430 embryos were seeded after either filtering through cell strainers ( $> 10 \mu\text{m}$ ), or isolation with  
431 lectins and their dilutors, or with no previous fractionation.

432 Sixteen wells were seeded with cells from stage X embryos and cultured in germ cell medium  
433 supplemented N-acethyl-D(+)-glucosamine (Sigma; 0,3 mg/ml).

434 After a week when numerous PGC-LCs were seen in suspension, approximately every week  
435 cell cultures were passed to larger well plates; first to 24-well plates using hanging cells  
436 inserts of  $5 \mu\text{m}$ , and then to 12 well plates without inserts. Hanging cell inserts of that size  
437 guaranteed a fluid media exchange and prevented loosing cells.

#### 438 **Characterization of PGC-LCs**

439 *Immunohistochemistry of PGC-LCs in cellular isolates and embryos.* PGC-LCs were  
440 identified in all embryos and cell isolates by immunohistochemistry and glycoprotein  
441 histochemistry.

442 Anti-VASA ( H-80 Cat#: sc-67185 Santa Cruz Biotechnology rabbit IgG polyclonal) was used  
443 for immunohistochemistry since VASA gene is expressed only in germ cells and gonocytes at  
444 all stages of development, and also anti-SSEA-1 (Hybridoma bank monoclonal antibody).  
445 Fixation was performed in 5% PFA in PBS for 15 minutes at RT (isolated cells). To minimize  
446 nonspecific binding, the fixed cells and embryos were treated for 3 hours with 3% BSA and  
447 0.1% triton X-100 in PBS before immunostaining. Embryos and cells were incubated for 24  
448 hours with the primary antibodies at  $4^{\circ}\text{C}$  and subsequently reacted for 24 hours each with  
449 alexa-568 donkey anti-mouse (for monoclonal first antibody, Invitrogen) and alexa-488  
450 donkey anti-rabbit (for polyclonal first antibody, Invitrogen). The optimal concentration of  
451 each antibody was selected based on the recommended manufacturer's conditions for primary  
452 antibodies (1/30 and 1/50 for anti-VASA and anti-SSEA1, respectively) and 1/500 for both  
453 secondary antibodies.

454

Novel methods PGC isolation culture

455

456 **DECLARATIONS**

457 **List of Abbreviations**

458 PGCs. - Primordial germ cells

459 ESCs.- Embryonic stem cells

460 iPSC.- induced pluripotent stem cells

461 IMACS.- Magnetic-Activated Cell Sorting

462 FACS.- Fluorescent-Activated Cell Sorting

463 SSEA1.- Stage-specific embryonic antigen-1

464 EMA.- Primordial germ cell marker (mouse)

465 WGA. - Wheat germ agglutinin

466 Con A. - Concanavalin A

467 PGC-LC. - Primordial germ cell like cell

468 PFA. - Paraformaldehyde

469 PBS. - Phosphate buffer saline

470 DPBS. - Dulbecco phosphate buffer saline

471 BRL. - Buffalo Rat Liver

472 FBS. - Fetal bovine serum

473 DMEM- KO. - Dulbecco modified eagle medium knockout

474 rhFGFb. - recombinant human FGF basic

475 rmSCF. - recombinant murine SCF

476 NPC. - Neural progenitor cell

477 GlcNAc. - N-acethyl D+glucosamine

478 GnTV. - N-acetylglucosaminyltransferase

479 **Ethics approval and consent to participate** 'Not applicable'

480 **Consent for publication** 'Not applicable'

481 **Authors' contributions** 'Not applicable'

482 **Availability of data and material**

Novel methods PGC isolation culture

483 The datasets during and/or analysed during the current study available from the corresponding  
484 author on reasonable request.

#### 485 **Competing interests**

486 The authors declare no competing or financial interests.

#### 487 **Founding source**

488 This study was undertaken thanks to all resources available at Gene Expression Laboratory,  
489 Salk Institute for Biological Studies, 10010 North Torrey Pines Road, La Jolla, California  
490 92037, USA. Sponsored by Dr Juan Carlos Izpisua Belmonte. Also this study was partly  
491 supported by the grant AGL 2009E06345–MICINN (Spain).

#### 492 **Acknowledgements**

493 This study could not be undertaken without the resources and hospitality of Dr Juan Carlos  
494 Izpisua Belmonte's Lab at Salk Institute (La Jolla San Diego, CA).

495 The author acknowledges the valuable support of Dra Capitolina Díaz Martínez President of  
496 AMIT (Asociación de Mujeres Investigadoras y Tecnólogas). Also thanks to the Direction of  
497 INIA (Instituto Nacional de Investigaciones y Tecnologías Agraria y Alimentaria). This study  
498 was partly supported by the grant AGL 2009E06345–MICINN (Spain).

499 The monoclonal antibodies anti-SSEA-1 developed by Solter and Knowles, and Spradling,  
500 and Williams, respectively, were obtained from the Developmental Studies Hybridoma Bank  
501 developed under the auspices of the NICHD and maintained by The University of Iowa,  
502 Department of Biology, Iowa City, IA 52242.

503

504

505

## REFERENCES

506

507 [1] **Esfandiari E., Mashinchian O., Ashtiani M. K., Ghanian M. H., Hayashi K., Saei**  
508 **A. A., Mahmoudi M., Baharvand H.** (2015). Possibilities in Germ Cell Research: An  
509 Engineering Insight *Trends Biotechnol.* Dec;33(12):735-46. doi:  
510 10.1016/j.tibtech.2015.09.004. Epub 2015 Oct 20.

511 [2] **Sugawa F., Araúzo-Bravo M. J., Yoon J., Kim K. P., Aramaki S., Wu G., Stehling**  
512 **M., Psathaki O. E., Hübner K., Schöler H. R.** (2015). Human primordial germ cell  
513 commitment in vitro associates with a unique PRDM14 expression profile. *EMBO J.*  
514 2015 Apr 15;34(8):1009-24. doi: 10.15252/embj.201488049. Epub 2015 Mar 6

515 [3] **Dubois, R.** (1969). Données nouvelles sur la localisation des cellules germinales  
516 primordiales dans le germe non incubé de poulet. *C. R. Acad. Sci.* **269**, 205–208

517 [4] **Kuwana, T. and Fujimoto, T.** (1984). Locomotion and scanning electron  
518 microscopic observations of primordial germ cells from the embryonic chick blood *in*  
519 *vitro*. *Anat. Rec.* **209**, 337-343.

520 [5] **Muniesa, P. and Dominguez, L.** (1990). A morphological study of primordial germ  
521 cells at pregastrular stages in the chick embryo. *Cell Differ Dev.* Aug; **31**(2):105-17.

522 [6] **Swift, H. M.** (1914). Origin and early history of the primordial germ-cells in the chick.  
523 *Am J Anat.* U S A. **15**:486.

524 [7] **Yasuda, Y., Tajima, A., Fujimoto, T. and Kuwana, T.** (1992). A method to obtain  
525 avian germ-line chimaeras using isolated primordial germ cells. *J. Reprod. Fert.* **96**,  
526 521–528.

527 [8] **Park, T. S., Jeong, D. K., Kim, J. N., Song, G. H., Hong, Y. H., Lim, J. M., Han, J.**  
528 **Y.** (2003). Improved germline transmission in chicken chimeras produced by  
529 transplantation of gonadal primordial germ cells into recipient embryos. *Biol Reprod.*  
530 May; **68**(5):1657-62.

531 [9] **Mozdziak, PE, Angerman-Stewart, J., Rushton, B., Pardue, S. L., Petite, J. N.**  
532 (2005). Improved Isolation of chicken primordial germ cells using fluorescence-  
533 activated cell sorting. *Poult Sci Reprod.* **84**(4):594-600.

534 [10] **Macdonald J., Glover J. D., Taylor L., Sang H. M., McGrew M. J.** (2010).  
535 Characterisation and germline transmission of cultured avian primordial germ cells.  
536 *PLoS One.* 2010 Nov 29;5(11):e15518. doi: 10.1371/journal.pone.0015518

537 [11] **Miyahara, D., Mori, T., Makino, R., Nakamura, Y, Oishi, I, Ono, T., Nirasawa,**  
538 **K., Tagami, T and Kagami, H.** (2014). Culture conditions for maintain propagation,  
539 long-term survival and germline transmission of chicken primordial germ cell-like  
540 cells. *J. Poult. Sci.* **51**: 87-95.

541 [12] **Miyahara D., Oishi I., Makino R., Kurumisawa N., Nakaya R., Ono T., Kagami**  
542 **H., Tagami T.** (2016). Chicken stem cell factor enhances primordial germ cell



Novel methods PGC isolation culture

- 543 proliferation cooperatively with fibroblast growth factor 2. *J Reprod Dev.* Apr  
544 22;62(2):143-9. doi: 10.1262/jrd.2015-128. Epub 2015 Dec 2.
- 545 [13] van de Lavoie, M. C., Diamond, J. H., Leighton, P. A., Mather-Love, C., Heyer,  
546 B. S., Bradshaw, R., Kerchner, A., Hooi, L. T., Gessaro, T. M., Swanberg, S. E.,  
547 Delany, M. E. and Etches, R. J. (2006a). Germline transmission of genetically  
548 modified primordial germ cells. *Nature* **441**, 766–769.
- 549 [14] Naito M., Harumi T., Kuwana T. (2015). Long-term culture of chicken primordial  
550 germ cells isolated from embryonic blood and production of germline chimaeric  
551 chickens. *Anim Reprod Sci.*Feb; **153**:50-61. doi: 10.1016/j.anireprosci.2014.12.003.  
552 Epub 2014 Dec 24.
- 553 [15] Whyte, J., Glover, J.; Woodcock, M.; Brzeszczynska, J.; Taylor, L.; Sherman,  
554 A.; Kaiser, P.; McGrew, M. (2015). FGF, Insulin, and SMAD Signaling Cooperate  
555 for Avian Primordial Germ Cell Self-Renewal. In: *Stem Cell Reports*, 01.11
- 556 [16] Etches R. Methods for selecting germ-line competent cells in chicken embryos, and  
557 the use of the cells in the production of chimeras. Sep 1998. International Patent  
558 Classification. C12N 5/06, A01K 67/027
- 559 [17] Reisner, Y. and Sharon, N. (1984). Fractionation of subpopulations of mouse and  
560 human lymphocytes by peanut agglutinin or soybean agglutinin. *Methods*  
561 *Enzymol.***108**:168-79.
- 562 [18] Sancho-Martinez, I., Nivet, E., Izpisua Belmonte, J. C. (2011). Purging and  
563 isolating pluripotent cells, "sweet" dreams become true?. *Cell Res*; **21**(11):1526-7.
- 564 [19] Cuminge, D. and Dubois, R. (1974). Role of glycoproteins in chemotactic  
565 migration of chick germinal cells, results with concanavalin A in organ culture. *C R*  
566 *Acad Sci Hebd Seances Acad Sci D.* Sep 16; **279**(12):99.
- 567 [20] Stern, C.D. (1991). The sub-embryonic fluid of the egg of the domestic fowl and its  
568 relationship to the early development of the embryo. In: *Avian incubation.* (ed. S.G.  
569 Tullett) London: Butterworths. pp. 81-90.
- 570 [21] Lopez-Diaz, MC, Bujan-Varela, J., Cadorniga-Valiño, C. (2016). Viable  
571 pluripotent chick blastodermal cells can be maintained long term in an alkaline defined  
572 medium. *In Vitro Cellular & Developmental Biology - Animal* (9989). DOI:  
573 10.1007/s11626-015-9989-5.
- 574 [22] Cummings, R. D. and Etzler, M. E. In: Varki A, Cummings RD, Esko JD, Freeze  
575 HH, Stanley P, Bertozzi CR, Hart GW, Etzler ME, editors. *Essentials of*  
576 *Glycobiology.* 2nd edition. Cold Spring Harbor (NY): Cold Spring Harbor Laboratory  
577 Press; 2009. Chapter 42.
- 578 [23] van de Lavoie, M. C. and Mather-Love, C. (2006) Avian Embryonic Stem Cells.  
579 *Methods in Enzymology.* **418**, 38-64.
- 580 [24] Song, Y., Duraisamy, S., Ali, J., Kizhakkayil, J., Jacob, V., Mohammed, M. A.,  
581 Mohammed A. Eltigani, M. A., Amisetty, S., Shukla, M. K., Etches, R. J. and van  
582 de Lavoie, M-C. (2014). Characteristics of Long-Term Cultures of Avian Primordial  
583 Germ Cells and Gonocytes. *Biol Reprod.* **90**(1):15, 1–8.

Novel methods PGC isolation culture

- 584 [25] **Kleene, R. and Schachner, M.** (2004). Glycans and neural cell interactions. *Nat Rev*  
585 *Neurosci.* Mar; **5**(3):195-208.
- 586 [26] **Hamanoue, M., Sato, K., Takamatsu, K.** (2008). Lectin panning method: the  
587 prospective isolation of mouse neural progenitor cells by the attachment of cell surface  
588 N-glycans to *Phaseolus vulgaris* erythroagglutinating lectin-coated dishes.  
589 *Neuroscience.* Dec 10; **157**(4):762-71.
- 590 [27] **Hamanoue, M., Matsuzaki, Y., Sato, K., Okano, H. J., Shibata, S., Sato, I.,**  
591 **Suzuki, S., Ogawara, M., Takamatsu, K., Okano, H.** (2009). Cell surface N-glycans  
592 mediated isolation of mouse neural stem cells. *J Neurochem.* Sep; **110**(5):1575-84.
- 593 [28] **Hamanoue, M. and Okano, H.** (2011). Cell surface N-glycans-mediated isolation  
594 of mouse neural stem cells. *J Cell Physiol.* Jun; **226**(6):1433-8.
- 595 [29] **Hamanoue, M. Ikeda, Y., Ogata, T., Takamatsu, K.** (2015). Predominant  
596 expression of N-acetylglucosaminyltransferase V (GnT-V) in neural stem/progenitor  
597 cells. *Stem Cell Res.* Jan; **14**(1):68-78.
- 598 [30] **Lillico, S.G., Sherman, A., McGrew, M. J., Robertson C. D., Smith, J., Haslam,**  
599 **C., Barnard, P., Radcliffe, P. A., Mitrophanous, K. A., Elliot, E. A., Sang, H. M.**  
600 (2007). Oviduct-specific expression of two therapeutic proteins in transgenic hens.  
601 *Proc Natl Acad Sci U S A.* Feb 6; **104** (6):1771-6.

602

Novel methods PGC isolation culture

603

604 Table 1. Percentage of fresh and fixed cells retained in cell strainers.

| Cell strainer pore ( $\mu\text{m}$ ) | Stage X (30)           |                                             | HH 8-9 (16)            |                                              |
|--------------------------------------|------------------------|---------------------------------------------|------------------------|----------------------------------------------|
|                                      | FRESH cells (pellet %) | Range of diameter<br>FIXED cells (pellet %) | FRESH cells (pellet %) | Range of diameter<br>FIXED cells *(pellet %) |
| <b>70</b>                            | -                      | -                                           | -                      | -                                            |
| <b>40</b>                            | -                      | 41-60 $\mu\text{m}$<br>20                   |                        | 40                                           |
| <b>10</b>                            | 50                     | 24-30 $\mu\text{m}$<br>60                   | 20                     | 14-17 $\mu\text{m}$<br>40                    |
| <b>6</b>                             | 2                      | -                                           | -                      | -                                            |
| <b>&lt;6</b>                         | 48                     | <6 $\mu\text{m}$<br>20                      | 80                     | <6 $\mu\text{m}$<br>20                       |

605

606

607

608

609

<sup>x</sup>These are measurements corresponding to groups of cells

\* When fresh cells were filtered through cell strainers the spectrum of retained cells was different than after fixing the cells. In HH 8-9 embryos fixed cells tends to stick to each other. Only isolated cells were measured.

Novel methods PGC isolation culture

610

611 **FIGURE LEGENDS**

612 **Fig 1. Glycohistology. Stage X embryo with WGA Alexa 594 and Con A Alexa 488.** A) Bright field. B) WGA Alexa 594 cells marked in the zona pellucida of embryo, where the PGCs are located at this stage. C) Con A Alexa 488 no cells were marked in zona pellucida (pink circle) x40.

615 **Fig 2. Glycohistology. HH 8-9 embryo with WGA Alexa 594 and Con A Alexa 488.** A) Bright field. B) WGA Alexa 594 only small fluorescent cells were observed in the entire body. C) Con A Alexa 488 (recognizes D mannosyl residues) marked only large cells around the cephalic area, where the PGCs are migrating at this stage of development (NT notochord SM somites), x100.

619 **Fig 3. Double staining Lectin-glycohistology and immunohistochemistry of HH 8-9 embryo with WGA Alexa 594 and VASA.** A) WGA Alexa 594 fluorescent cells were in the neck, small and large cells are marked. Large cells or PGCs are also recognized by VASA. B) VASA Alexa 488 labeled only PGCs (x100).

623 **Fig 4. PGCs positive to VASA immunohistochemistry in cephalic area of HH 8-9 embryos.** (A and B x40 and C x100).

625 **Fig 5. Cells isolated from Stage X and HH 8-9 embryos in coated lectins plates.** Fresh cells A, B and C. A and B PGCs isolated from stage X embryos after 1 hour incubation at room temperature (x100 and x400, respectively A and B). C) Colonies of PGC isolated from HH 8-9 embryos over tightly adhered cells (x100).

629 **Fig 6. Cells isolated from HH 8-9 embryos in coated-lectin plates.** Colonies of PGCs isolated from HH 8-9 embryos. Cultured under alkaline pH conditions after 48 hours. A) Bright field. B and C immunohistochemistry of VASA and SSEA-1, respectively. D) Hoescht (x200).

632 **Fig 7. Cells isolated from Stage X embryos using cell strainer (CS).** A and B cell retained in pore size of 40  $\mu\text{m}$  VASA positive (x40); C, D, E and F cells retained in CS of 10  $\mu\text{m}$  pore size are VASA positive (C, D and E, F are x100 and x400, respectively); G and H, cells retained in pore size of 6  $\mu\text{m}$ , all are VASA negative (x400).

636 **Fig 8. Primary culture of gonocyte-like cells in N-acetyl-D(+)-glucosamine supplemented germ cell medium.** A) Cells isolated from Stage X embryo with a diameter mean of 25  $\mu\text{m}$  at 17 days of culture (x200). B) Cells resembling oocyte are floating with a diameter mean of 30  $\mu\text{m}$  at 14 days of culture (x200). C and D cells are very refringent, are inside an spherical capsule of 40  $\mu\text{m}$ , some are leaving the capsule and other are mitotically active (black arrow) at 17 days of culture (x400).

641

642

643

Brighth field

*WGA lectin alexa 594*

*Con A lectin alexa 488*

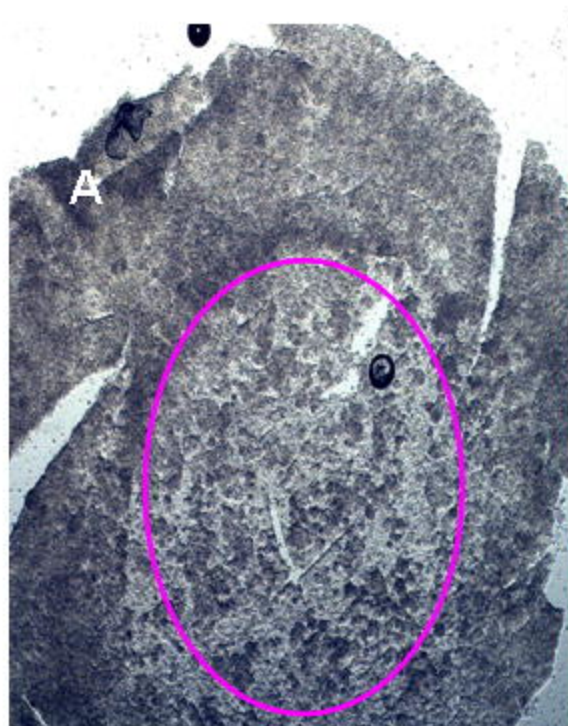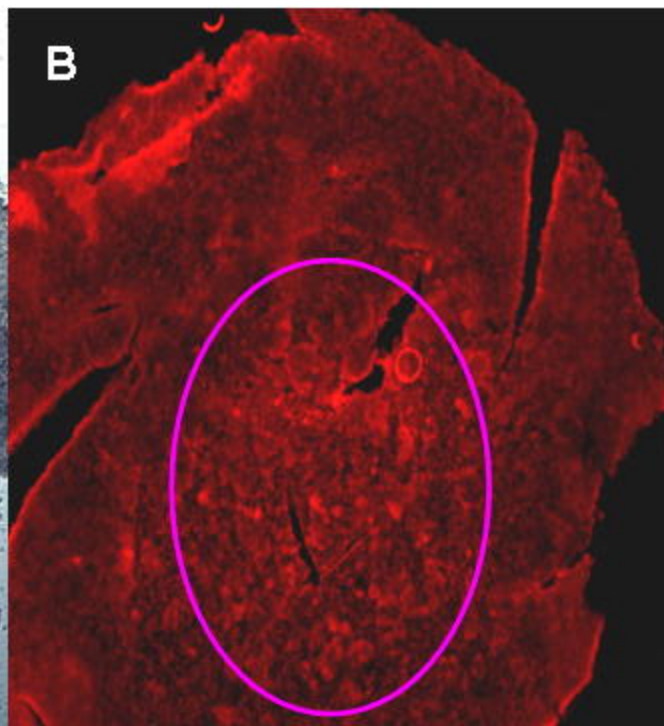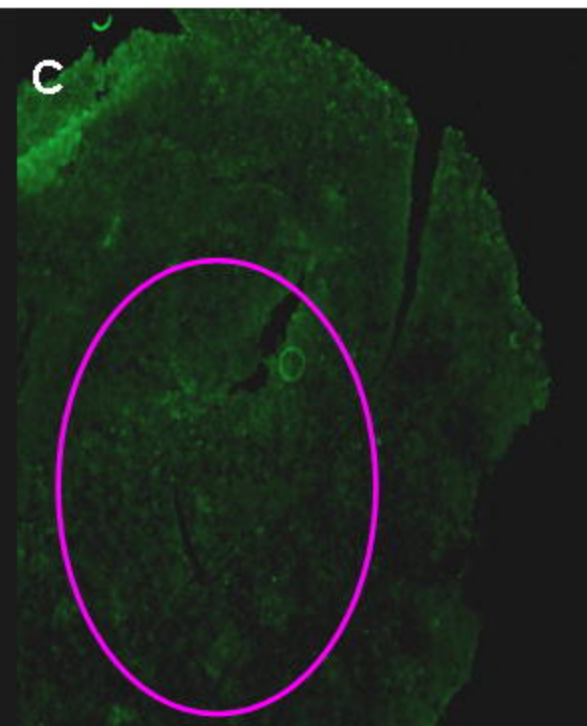

Brighth Field

WGA lectin alexa 594

Con A lectin alexa 488

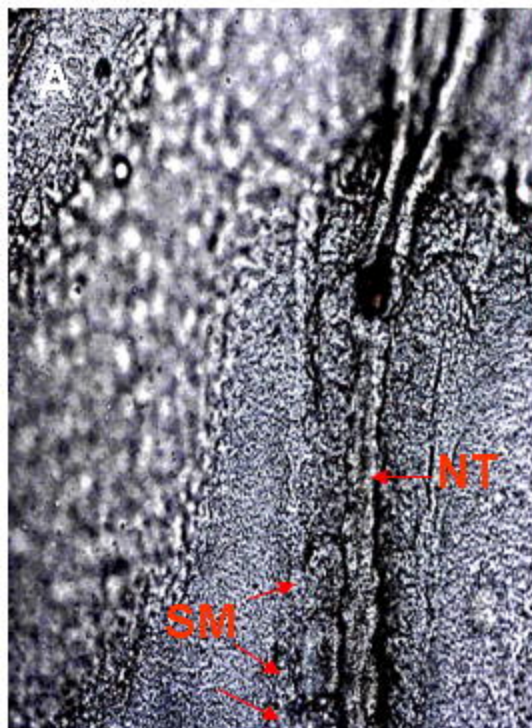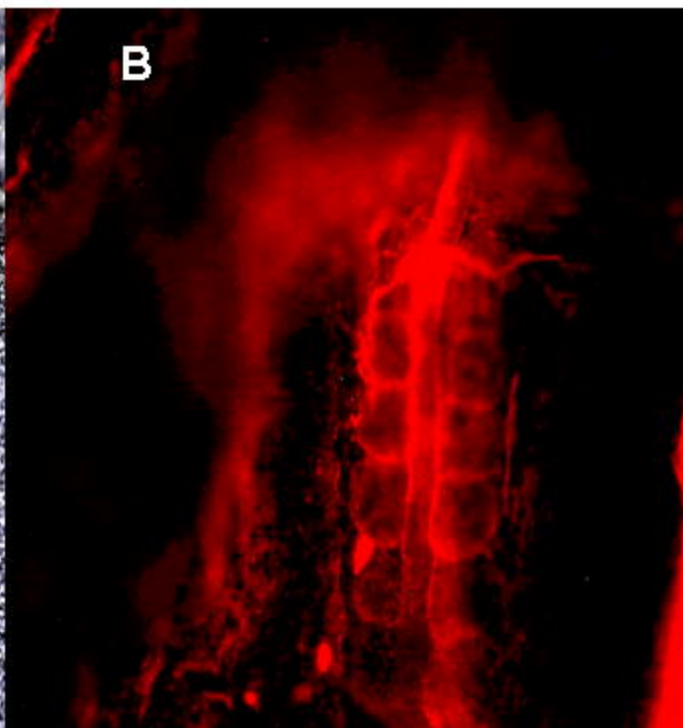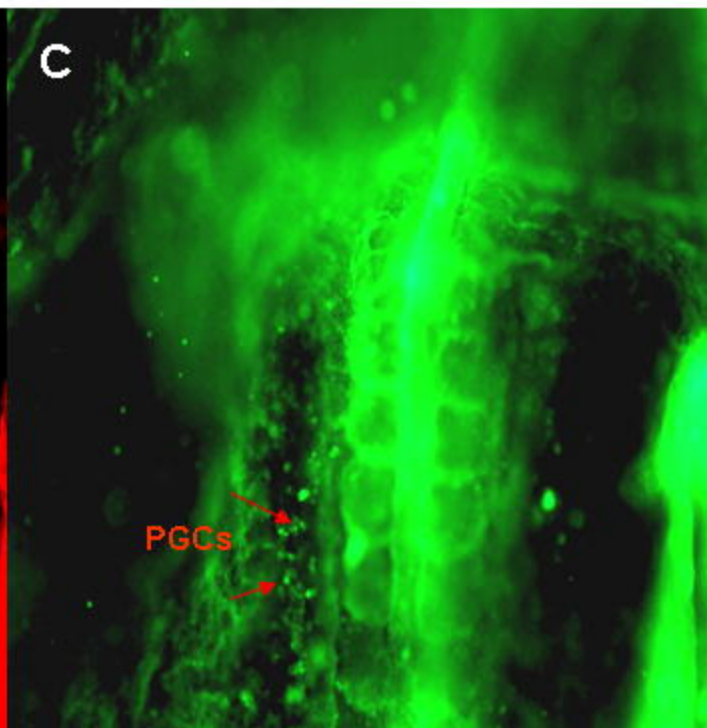

**WGA lectin alexa 594**

**VASA alexa 488**

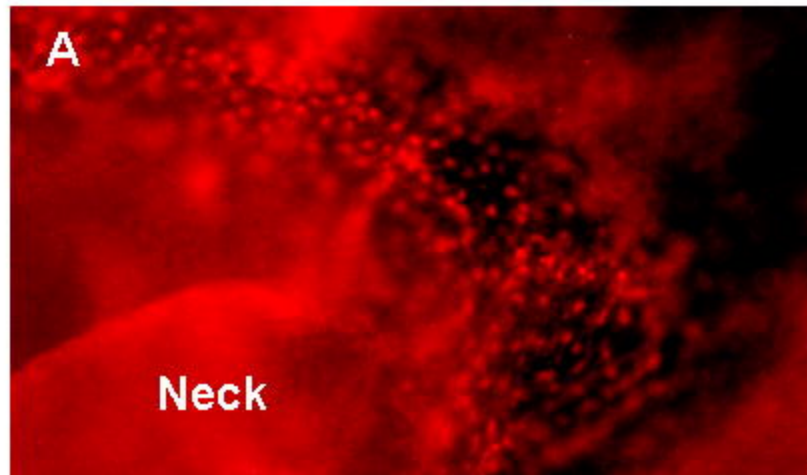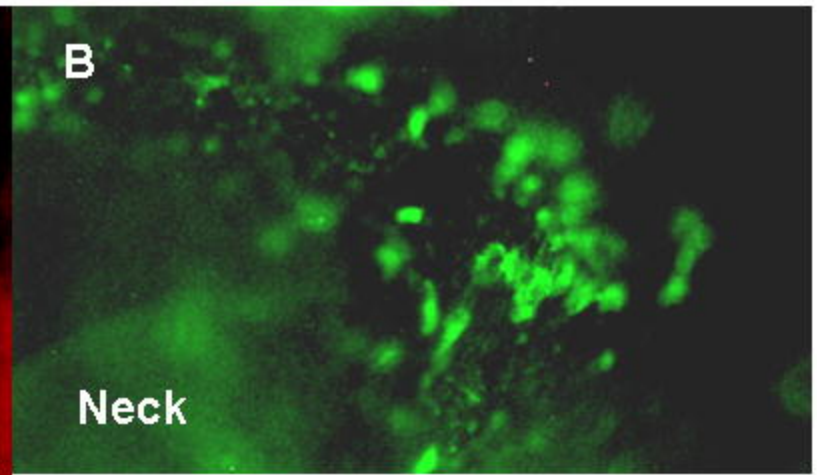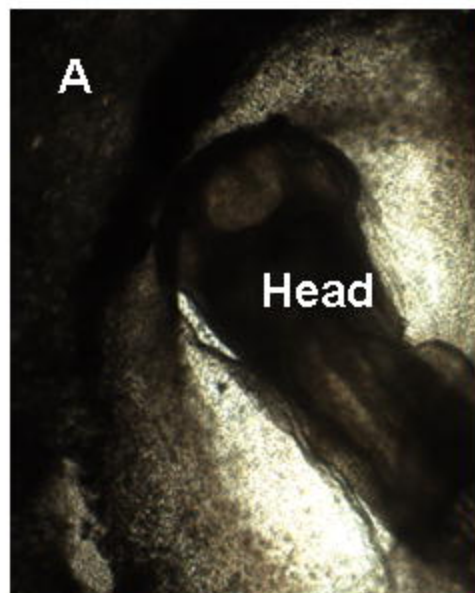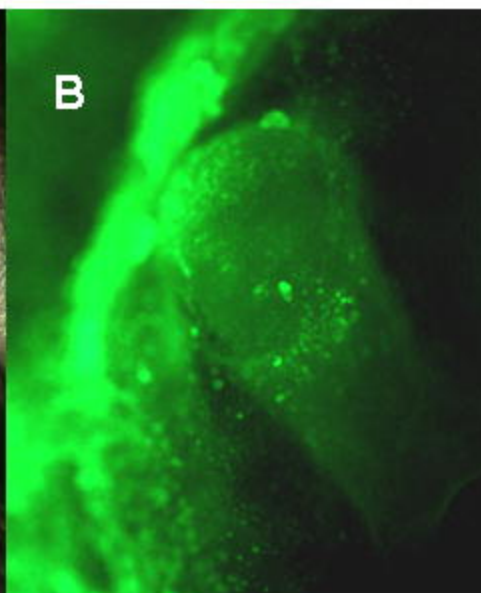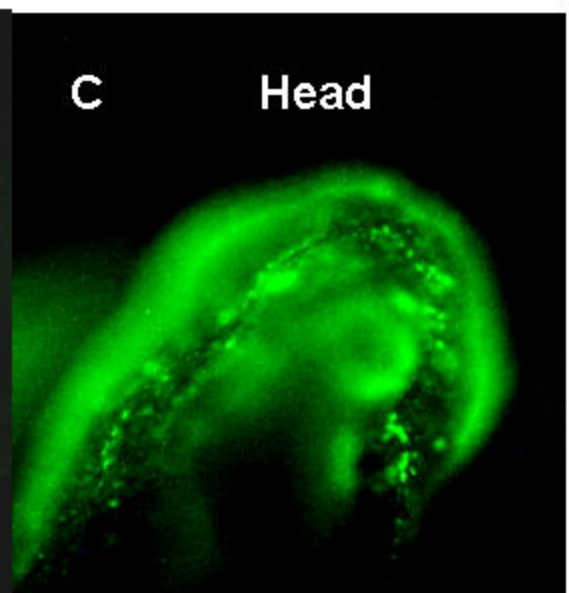

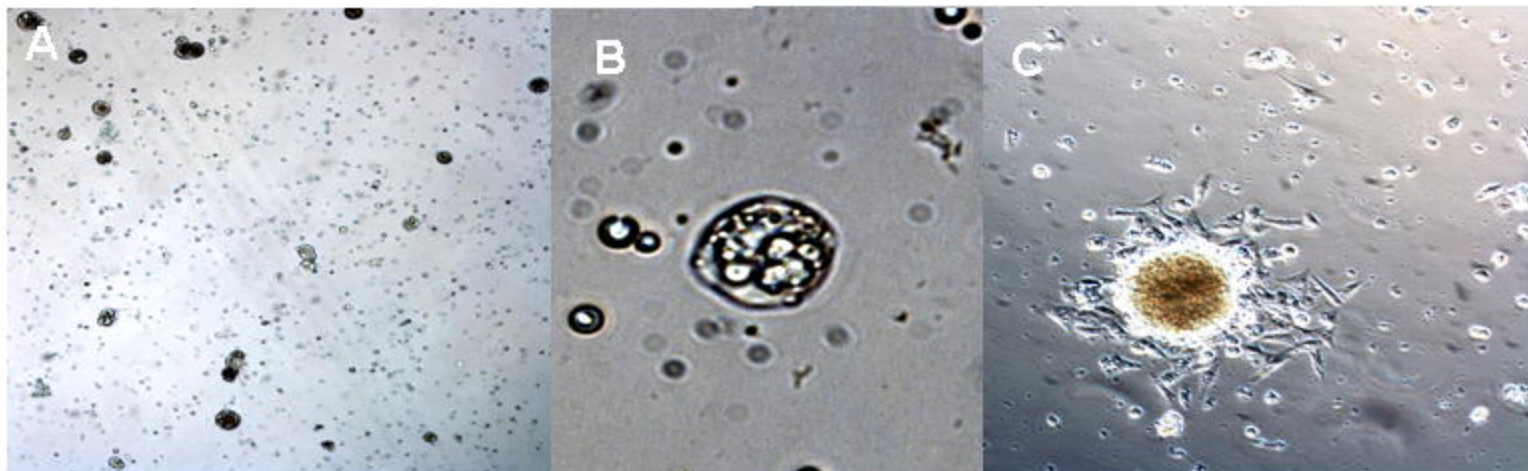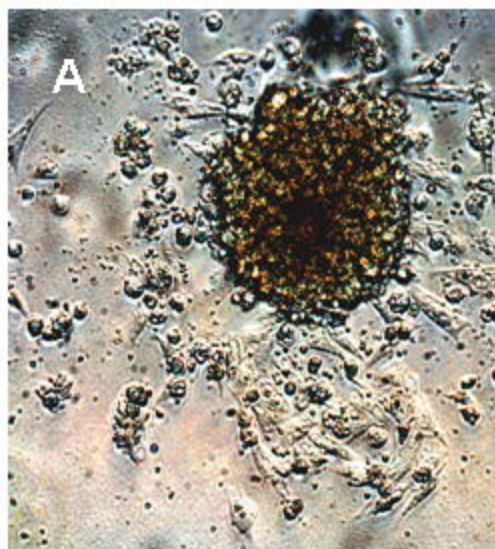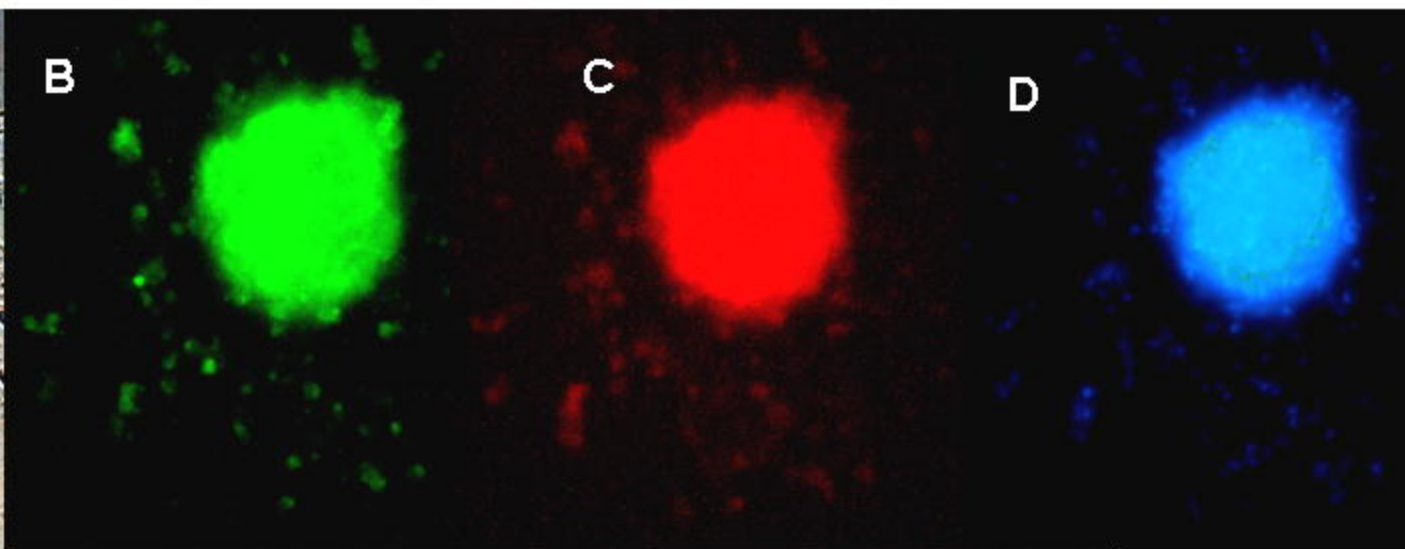



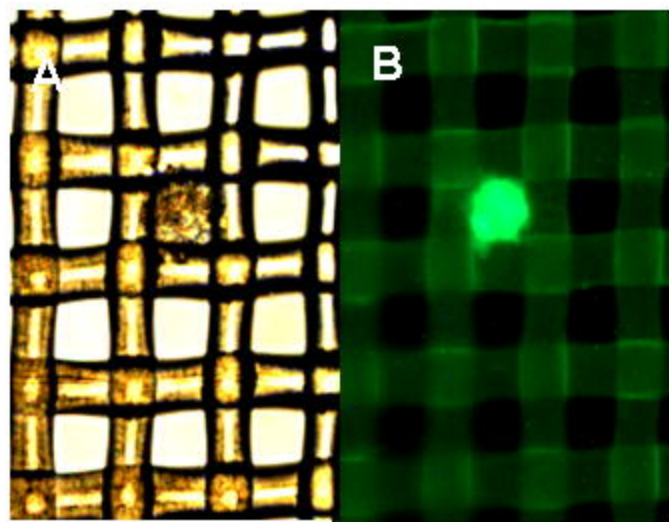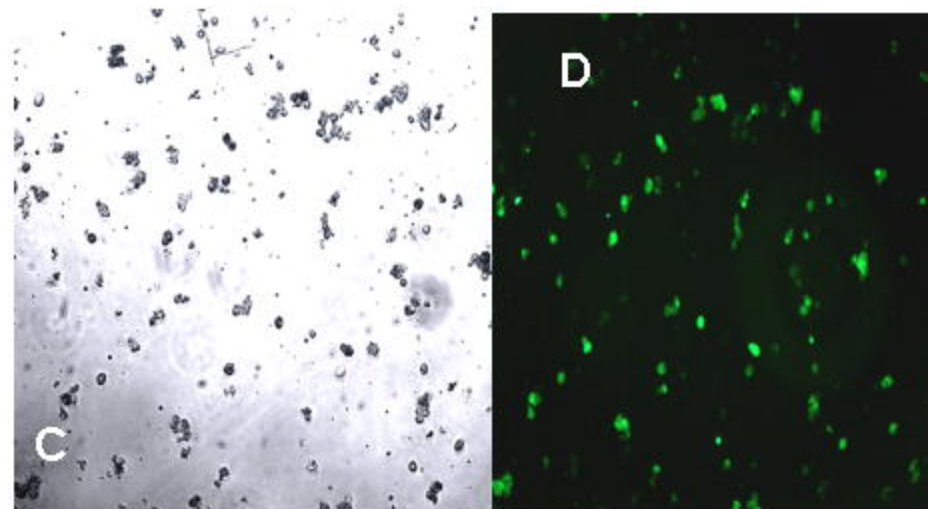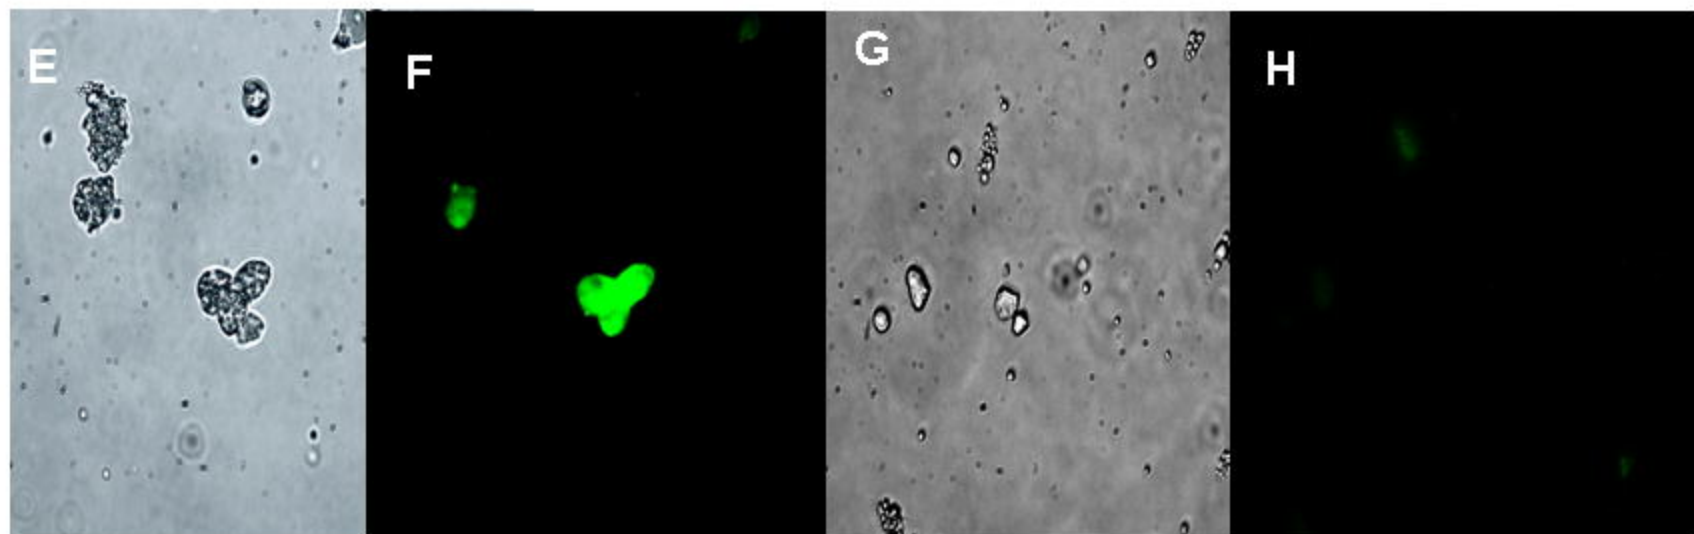

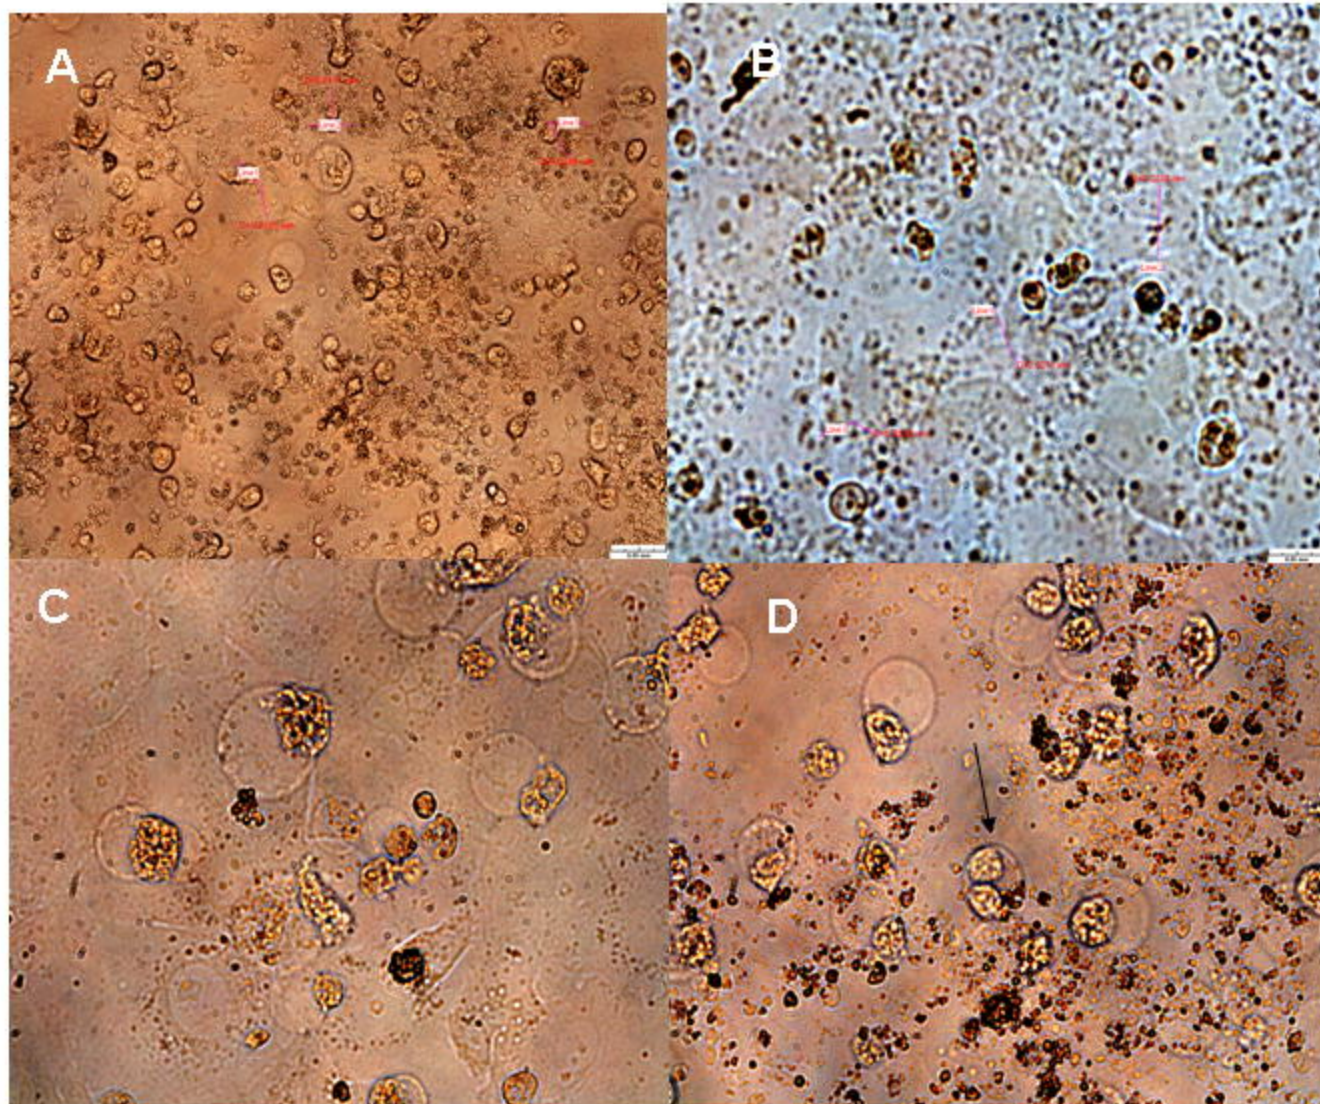

Source: http://biorxiv.org/content/10.1101/108571v1.full.pdf
